# Supplementary material for: Developing the APS-SE: Translation and Cultural Adaptation of the Abbey Pain Scale (APS) to A Swedish Care Context.
Source: Research Square preprint supplement (doi:10.21203/rs.3.rs-100676/v1), 2020-11-05
Supplement: Supplementary file 1 [file dc360fe084066e4b05c07b3a.docx]

Additional files

Additional file 1:

The semi-structured interview guide used in the interviews.

# **Interview guide – translation of the Abbey Pain Scale**

## Background information

Study number:

Profession:

Age:
Workplace:

Total number of years of occupational experience:

Number of years of occupational experience within geriatrics:
Number of years of occupational experience at residential care unit or ward where patients diagnosed with dementia receive care:

Previous experience of the Abbey Pain Scale: Yes □ No □

Swedish as native language: Yes □ No □

Woman □ Man □ Other □

May researchers contact the study subject during or after the analysis process if any questions arise? Yes □ No □

## Interview questions

Begin by showing the translation of the Abbey Pain Scale and describe the instrument, explaining that it has been developed within dementia care for patients who cannot verbalize pain. Explain that the purpose is to develop a valid Swedish translation. Begin by asking the interviewee to answer the Abbey Pain Scale from the standpoint of a patient that s/he knows. Ask the interviewee to think aloud when answering and to develop their thoughts.

The following interview questions are opening questions when answering the Abbey Pain Scale. Ask follow-up questions where the interviewee is allowed to develop his or her thoughts and where there are ambiguities.

Repeat questions 1-5 in the interview guide for each question 1-6 in the Abbey Pain Scale.

1. Describe your thought process when you fill in question 1.
   1. What do you think about question 1?
2. What formulations would you possibly want to change or clarify?
   1. Is anything in the question confusing or difficult to understand?
3. What are your thoughts on the formulation of the examples in question 1?
   1. Under question 6
      1. How do you interpret the term skin tears? What associations come to mind?
      2. Would it have made any difference if it said skin injury instead of skin tears?
         1. In what way?
4. How easy or difficult do you think it is to answer the question?
5. What are your thoughts when you score the question?
6. What are your thoughts about the rest of the text?
7. What are your thoughts on the scale “absent, mild, moderate, severe” in questions 1-6?
8. What are your thoughts about the scale ”no pain, mild, moderate, severe” when you have to place a mark in the total pain score?
9. What are your thoughts about the answers “chronic, acute, chronic and acute” at the bottom of the questionnaire?
10. What are your thoughts about the term job title?
    1. Would your response have been different if it had said profession instead?
11. How do you feel about the questionnaire in terms of appearance? Is there anything that needs to be changed to make it easier to fill in?
12. Do you feel that anything in the form is offensive or objectionable?
13. Do you have any other opinions about the Abbey Pain Scale?
14. Please make a summary of what you think is most important.
15. Would you like to add anything?
16. Now that we have finished the interview – do we still have your consent to use the interview? Yes □ No □
